# Supplementary material for: TMUB1 expression is associated with the prognosis of colon cancer and immune cell infiltration
Source: PeerJ journal article supplement (doi:10.7717/peerj.16334), 2023-11-17

**A**

Points  
 M stage  
 Pathologic stage  
 Lymphatic invasion  
 TMUB1  
 Total Points  
 Linear Predictor  
 1-year Survival Probability  
 3-year Survival Probability  
 5-year Survival Probability

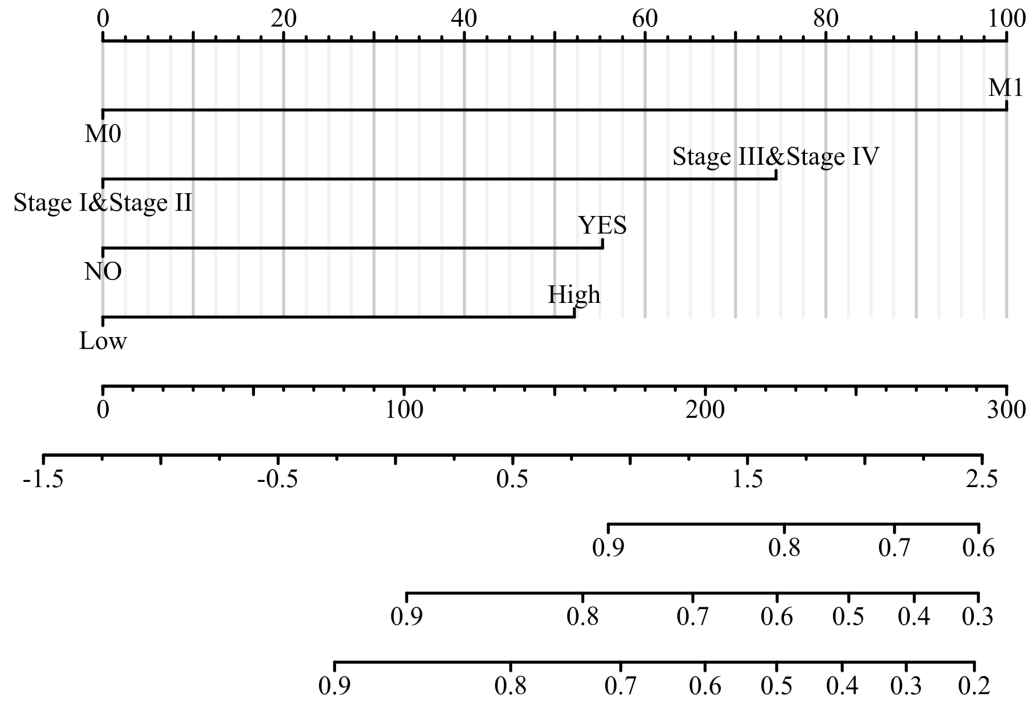**B**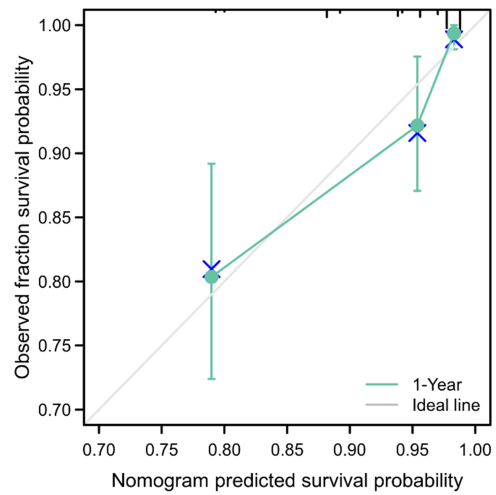**C**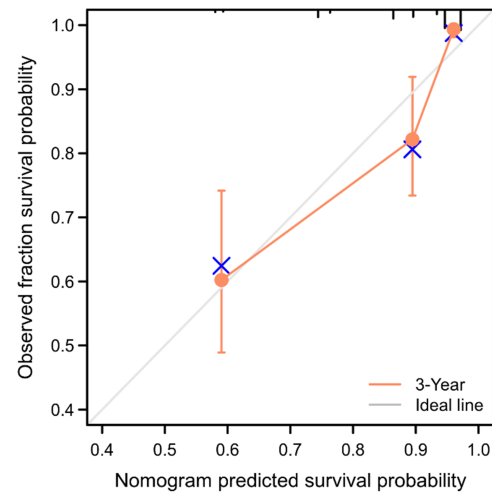**D**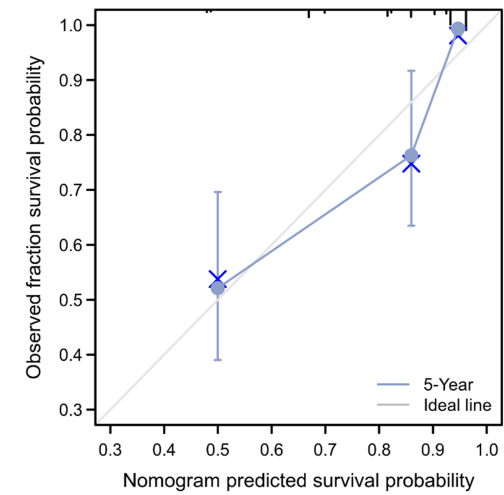

## E Disease Specific Survival

Points

M stage

Pathologic stage

Lymphatic invasion

TMUB1

Total Points

Linear Predictor

1-year Survival Probability

3-year Survival Probability

5-year Survival Probability

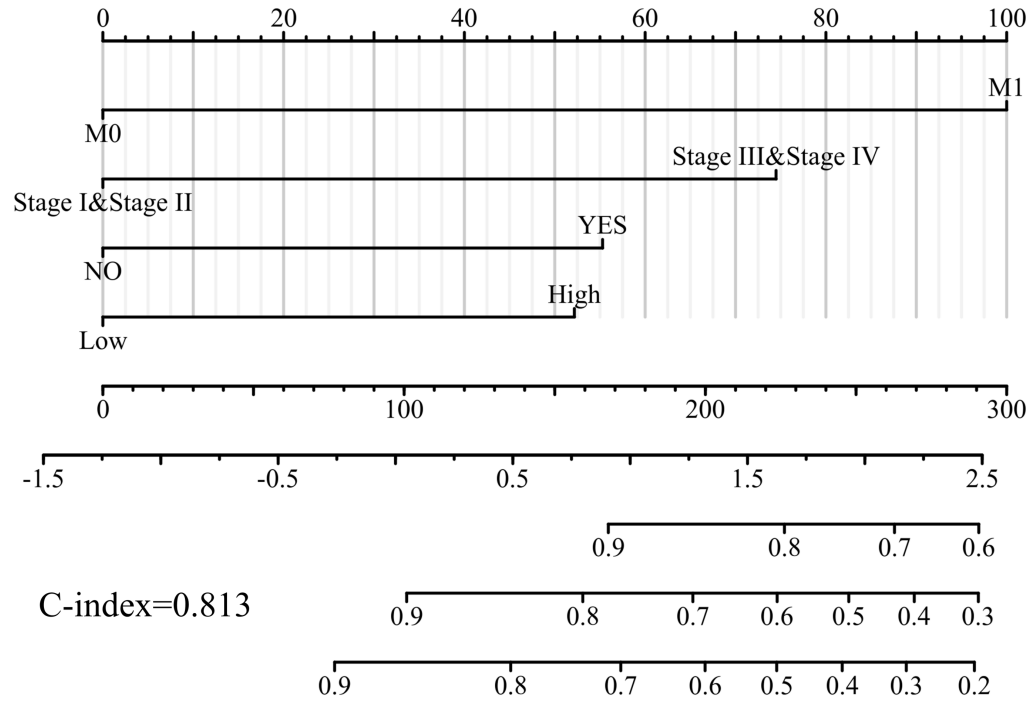

## F

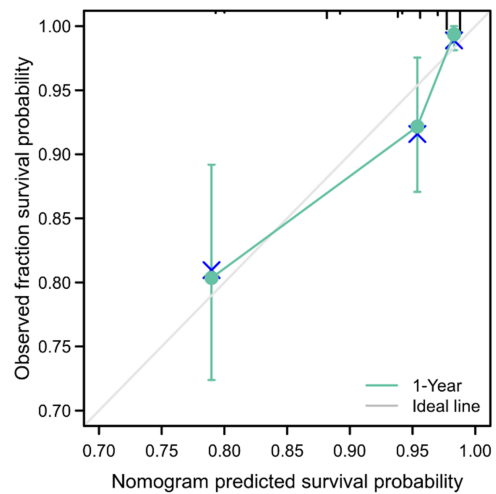

## G

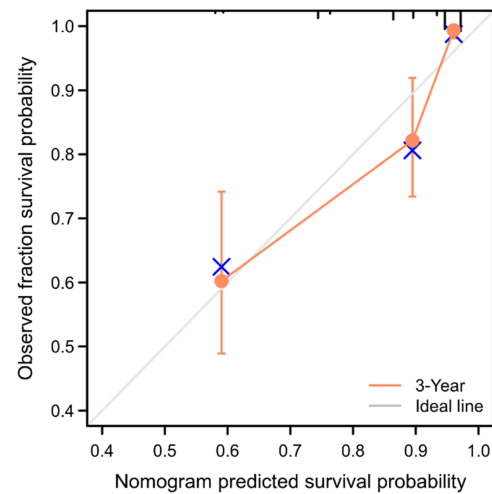

## H

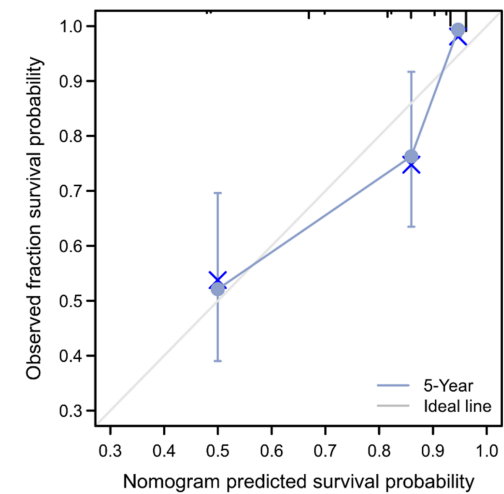

Supplement: FigureS1.pdf [file FigureS1.pdf]
