# Supplementary material for: TMUB1 expression is associated with the prognosis of colon cancer and immune cell infiltration
Source: PeerJ. 2023 Nov 17;11:e16334. doi: 10.7717/peerj.16334 (PMC10658890; doi:10.7717/peerj.16334)
Supplement: Supplemental Information 6 [file peerj-11-16334-s006.xlsx]

## Sheet: Sheet1
NCM460	HCT116	SW480	RKO	LOVO	HT29
1	0.996966	1.9958	2.68081	66.0479	2.87742
1	1.06734	2.09556	3.04337	75.289	2.73381
1	0.833012	1.7814	2.60288	40.1335	1.74334
HCT116
	Ct value	β-actin mean value	TUMB1-β-actin=△Ct	△△Ct	△△Ct*-1	2-△△ct	average
β-actin	13.5647	13.3998
	13.2902
	13.3444
TUMB1	24.5327	13.3998	11.133
	24.5279	13.3998	11.1281
	24.263	13.3998	10.8632
β-actin	14.8111	14.7178
	14.6048
	14.7377
TUMB1	25.8552	14.7178	11.1373	0.00438332	-0.00438332	0.996966	0.965772
	25.7519	14.7178	11.0341	-0.0940178	0.0940178	1.06734
	25.8446	14.7178	11.1268	0.26359	-0.26359	0.833012
SW480
	Ct value	β-actin mean value	TUMB1-β-actin=△Ct	△△Ct	△△Ct*-1	2-△△ct	average
β-actin	13.5647	13.3998
	13.2902
	13.3444
TUMB1	24.5327	13.3998	11.133
	24.5279	13.3998	11.1281
	24.263	13.3998	10.8632
β-actin	14.454	14.3298
	14.2011
	14.3343
TUMB1	24.8538	14.3298	10.5239	-0.609014	0.609014	1.52522	1.75792
	24.3294	14.3298	9.99963	-1.12849	1.12849	2.1863
	24.5494	14.3298	10.2196	-0.643614	0.643614	1.56224
RKO
	Ct value	β-actin mean value	TUMB1-β-actin=△Ct	△△Ct	△△Ct*-1	2-△△ct	average
β-actin	13.5647	13.3998
	13.2902
	13.3444
TUMB1	24.5327	13.3998	11.133
	24.5279	13.3998	11.1281
	24.263	13.3998	10.8632
β-actin	14.6553	14.5779
	14.4502
	14.6282
TUMB1	24.2882	14.5779	9.71029	-1.42267	1.42267	2.68081	2.77569
	24.1004	14.5779	9.52245	-1.60567	1.60567	3.04337
	24.061	14.5779	9.48309	-1.38011	1.38011	2.60288
LOVO
	Ct value	β-actin mean value	TUMB1-β-actin=△Ct	△△Ct	△△Ct*-1	2-△△ct	average
β-actin	13.5647	13.3998
	13.2902
	13.3444
s	24.5327	13.3998	11.133
	24.5279	13.3998	11.1281
	24.263	13.3998	10.8632
β-actin	16.6458	16.7003
	16.7277
	16.7276
s	21.7879	16.7003	5.08752	-6.04544	6.04544	66.0479	60.4901
	21.5941	16.7003	4.89375	-6.23437	6.23437	75.289
	22.2368	16.7003	5.53647	-5.32673	5.32673	40.1335
HT29
	Ct value	β-actin mean value	TUMB1-β-actin=△Ct	△△Ct	△△Ct*-1	2-△△ct	average
β-actin	13.5647	13.3998
	13.2902
	13.3444
s	24.5327	13.3998	11.133
	24.5279	13.3998	11.1281
	24.263	13.3998	10.8632
β-actin	14.1345	14.1797
	14.2777
	14.1269
s	23.7879	14.1797	9.60818	-1.52478	1.52478	2.87742	2.45152
	23.8569	14.1797	9.67721	-1.45091	1.45091	2.73381
	24.241	14.1797	10.0614	-0.80185	0.80185	1.74334
