# Supplementary material for: TMUB1 expression is associated with the prognosis of colon cancer and immune cell infiltration
Source: PeerJ. 2023 Nov 17;11:e16334. doi: 10.7717/peerj.16334 (PMC10658890; doi:10.7717/peerj.16334)
Supplement: Supplemental Information 7 [file peerj-11-16334-s007.xlsx]

## Sheet: Sheet1
patient1									patient2
		Ct value	β-actin mean value	TUMB1-β-actin=△Ct	△△Ct	△△Ct*-1	2-△△ct	average		Ct value	β-actin mean value	TUMB1-β-actin=△Ct	△△Ct	△△Ct*-1	2-△△ct	average
Nats	β-actin	18.924	18.9415						β-actin	17.5845	17.4683
		19.0053								17.4365
		18.8952								17.384
	TUMB1	31.2295	18.9415	12.2879					TUMB1	24.2507	17.4683	6.78236
		30.6493	18.9415	11.7078						24.4502	17.4683	6.98193
		30.3052	18.9415	11.3637						24.3468	17.4683	6.87851
Tumor	β-actin	19.2242	19.0221						β-actin	18.5729	18.5917
		19.1206								18.6845
		18.7216								18.5176
	TUMB1	26.5827	19.0221	7.56061	-4.72733	4.72733	26.4891	22.0942	TUMB1	23.0346	18.5917	4.44294	-2.33943	2.33943	5.06101	5.64985
		26.3633	19.0221	7.34119	-4.36664	4.36664	20.6296			22.8496	18.5917	4.25796	-2.72397	2.72397	6.60689
		26.1255	19.0221	7.10339	-4.26031	4.26031	19.1638			23.0692	18.5917	4.47752	-2.40099	2.40099	5.28166
patient3									patient4
		Ct value	β-actin mean value	TUMB1-β-actin=△Ct	△△Ct	△△Ct*-1	2-△△ct	average		Ct value	β-actin mean value	TUMB1-β-actin=△Ct	△△Ct	△△Ct*-1	2-△△ct	average
Nats	β-actin	18.2197	18.2898						β-actin	19.8639	19.6352
		18.3416								19.5108
		18.3081								19.5309
	TUMB1	29.6076	18.2898	11.3178					TUMB1	28.2277	19.6352	8.59245
		28.8208	18.2898	10.531						28.3467	19.6352	8.7115
		31.0107	18.2898	12.7209						29.3548	19.6352	9.71961
Tumor	β-actin	19.7387	19.5743						β-actin	17.6873	17.7316
		19.5016								17.6374
		19.4825								17.8699
	TUMB1	28.6241	19.5743	9.04981	-2.26796	2.26796	4.81642	3.9982	TUMB1	24.6519	17.7316	6.92033	-1.67212	1.67212	3.18683	3.64887
		27.8051	19.5743	8.23087	-2.30014	2.30014	4.92507			24.622	17.7316	6.89042	-1.82107	1.82107	3.53343
		31.1232	19.5743	11.549	-1.17193	1.17193	2.25312			25.3718	17.7316	7.64019	-2.07941	2.07941	4.22635
patient5									patient6
		Ct value	β-actin mean value	TUMB1-β-actin=△Ct	△△Ct	△△Ct*-1	2-△△ct	average		Ct value	β-actin mean value	TUMB1-β-actin=△Ct	△△Ct	△△Ct*-1	2-△△ct	average
Nats	β-actin	15.9277	16.1497						β-actin	19.8639	19.6352
		16.1052								19.5108
		16.4163								19.5309
	TUMB1	24.8911	16.1497	8.74132					TUMB1	28.2277	19.6352	8.59245
		25.1048	16.1497	8.95501						28.3467	19.6352	8.7115
		25.1086	16.1497	8.95887						29.3548	19.6352	9.71961
Tumor	β-actin	15.6445	15.6413						β-actin	17.6873	17.7316
		15.6118								17.6374
		15.6677								17.8699
	TUMB1	23.0142	15.6413	7.37286	-1.36846	1.36846	2.58195	2.14325	TUMB1	25.4519	17.7316	7.72033	-0.872121	0.872121	1.83035	2.25151
		23.3476	15.6413	7.70632	-1.2487	1.2487	2.37626			25.4022	17.7316	7.67064	-1.04086	1.04086	2.05745
		24.0429	15.6413	8.40154	-0.557327	0.557327	1.47154			25.9318	17.7316	8.20019	-1.51941	1.51941	2.86674
patient7									patient8
		Ct value	β-actin mean value	TUMB1-β-actin=△Ct	△△Ct	△△Ct*-1	2-△△ct	average		Ct value	β-actin mean value	TUMB1-β-actin=△Ct	△△Ct	△△Ct*-1	2-△△ct	average
Nats	β-actin	24.0206	24.0856						β-actin	23.5937	23.497
		24.0906								23.3383
		24.1458								23.5591
	TUMB1	25.5718	24.0856	1.48618					TUMB1	26.3581	23.497	2.86103
		25.3473	24.0856	1.26166						26.2197	23.497	2.72262
		26.0927	24.0856	2.00704						26.7924	23.497	3.2954
Tumor	β-actin	22.3783	22.1856						β-actin	23.5945	23.6447
		21.5158								23.622
		22.6626								23.7177
	TUMB1	23.3986	22.1856	1.213	-0.273185	0.273185	1.20847	1.43025	TUMB1	26.7967	23.6447	3.15196	0.29093	-0.29093	0.817375	0.959568
		23.0105	22.1856	0.824894	-0.436768	0.436768	1.35357			26.4271	23.6447	2.78238	0.0597567	-0.0597567	0.959426
		23.4029	22.1856	1.21735	-0.789697	0.789697	1.72871			26.8001	23.6447	3.1554	-0.139997	0.139997	1.1019
patient9									patient10
		Ct value	β-actin mean value	TUMB1-β-actin=△Ct	△△Ct	△△Ct*-1	2-△△ct	average		Ct value	β-actin mean value	TUMB1-β-actin=△Ct	△△Ct	△△Ct*-1	2-△△ct	average
Nats	β-actin	20.2563	20.1701						β-actin	27.8611	27.7045
		20.202								27.5369
		20.0519								27.7155
	TUMB1	30.9086	20.1701	10.7385					TUMB1	26.9741	27.7045	-0.730439
		31.9516	20.1701	11.7815						26.4658	27.7045	-1.23873
		32.5244	20.1701	12.3543						27.1521	27.7045	-0.552412
Tumor	β-actin	19.4262	19.5524						β-actin	28.2878	28.4207
		19.4548								28.5844
		19.7761								28.3899
	TUMB1	30.1715	19.5524	10.6191	-0.119347	0.119347	1.08624	1.29222	TUMB1	27.1761	28.4207	-1.2446	-0.514164	0.514164	1.42817	1.79368
		31.5972	19.5524	12.0448	0.263284	-0.263284	0.833189			26.5707	28.4207	-1.85003	-0.611308	0.611308	1.52764
		30.9379	19.5524	11.3855	-0.9688	0.9688	1.95721			26.5902	28.4207	-1.83053	-1.27812	1.27812	2.42523
