# Supplementary material for: TMUB1 expression is associated with the prognosis of colon cancer and immune cell infiltration
Source: PeerJ. 2023 Nov 17;11:e16334. doi: 10.7717/peerj.16334 (PMC10658890; doi:10.7717/peerj.16334)
Supplement: Supplemental Information 8 [file peerj-11-16334-s008.xlsx]

## Sheet: Sheet1
Group	NATs			Tumor
patient1	1	1	1	26.4891	20.6296	19.1638
patient2	1	1	1	5.06101	6.60689	5.28166
patient3	1	1	1	4.81642	4.92507	2.25312
patient4	1	1	1	3.18683	3.53343	4.22635
patient5	1	1	1	2.58195	2.37626	1.47154
patient6	1	1	1	1.83035	2.05745	2.86674
patient7	1	1	1	1.20847	1.35357	1.72871
patient8	1	1	1	0.817375	0.959426	1.1019
patient9	1	1	1	1.08624	0.833189	1.95721
patient10	1	1	1	1.42817	1.52764	2.42523
